# Supplementary material
Source: bioRxiv or medRxiv preprint supplement (https://medrxiv.org/highwire/filestream/71485/field_highwire_adjunct_files/5/2020.01.27.20016725-6.pdf)
Supplement: Supplementary file [file 2020.01.27.20016725-6.pdf]

Any Bacteria: ROC Curve

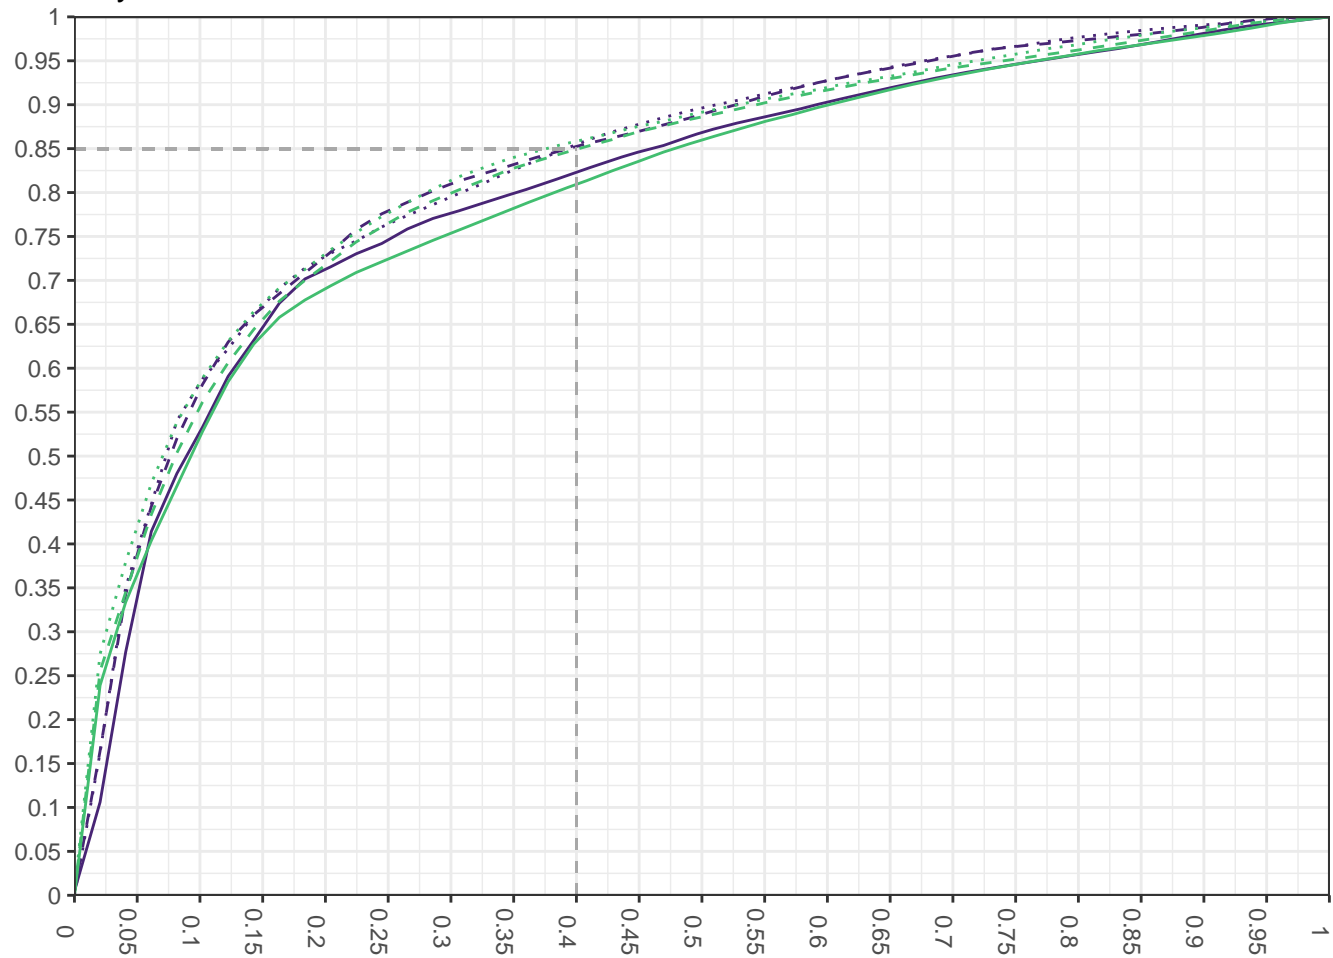

Model — LR — RF No. of Variables — 5 — 10 — 20
